# Supplementary material for: The Eukaryote-Like Serine/Threonine Kinase STK Regulates the Growth and Metabolism of Zoonotic Streptococcus suis
Source: PubMed Central journal article supplement (PMC5339665; doi:10.3389/fcimb.2017.00066), 2017-03-07
Supplement: Image1.pdf [file Image1.pdf]

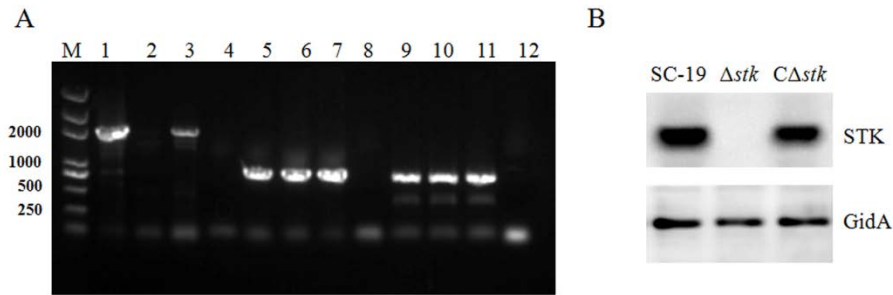

**Figure S1 Confirmation of the isogenic mutant  $\Delta stk$  and the complementary strain  $C\Delta stk$ .** (A) **Confirmation of the  $\Delta stk$  and  $C\Delta stk$  by RT-PCR.** Lanes 1-4 represent the amplification of *stk* using the primer set *stk*-F and *stk*-R. Lanes 5-8 represent the amplification of downstream gene of *stk* using the primer set 0427-F and 0427-R. Lanes 9-12 represent the amplification of upstream gene of *stk* using the primer set 0429-F and 0429-R. Lanes 1, 5 and 9 use cDNA of SC-19 as templates, lanes 2, 6 and 10 use cDNA of  $\Delta stk$ , whereas lanes 3, 7, 11 use cDNA of  $C\Delta stk$ . Lanes 4, 8, 12 represent the negative control. (B) **Confirmation of the  $\Delta stk$  and  $C\Delta stk$  by Western blot analysis.** The supernatant of cell lysate from SC-19,  $\Delta stk$  and  $C\Delta stk$  were disposed for immunoblot analysis with STK or GidA polyclonal antibodies. An antibody directed against GidA was used as loading control.
