# Supplementary material for: The Eukaryote-Like Serine/Threonine Kinase STK Regulates the Growth and Metabolism of Zoonotic Streptococcus suis
Source: PubMed Central journal article supplement (PMC5339665; doi:10.3389/fcimb.2017.00066), 2017-03-07
Supplement: Image2.pdf [file Image2.pdf]

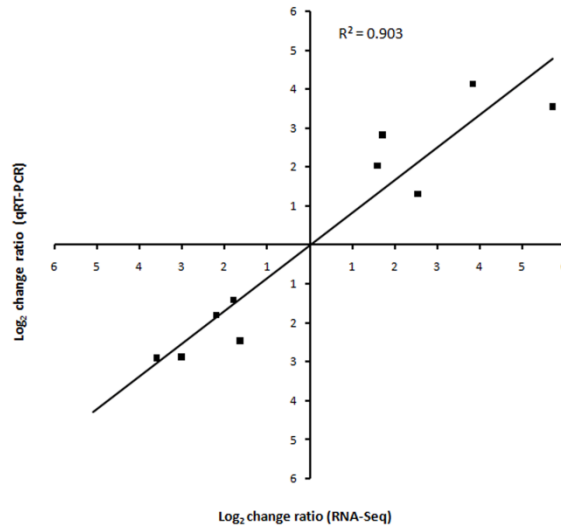

**Figure S2A Correlation between the transcriptome data and the qRT-PCR results.** The fold changes in transcript levels of 10 selected genes determined by both methods were log<sub>2</sub> transformed, and the values were plotted against each other to evaluate their correlation.

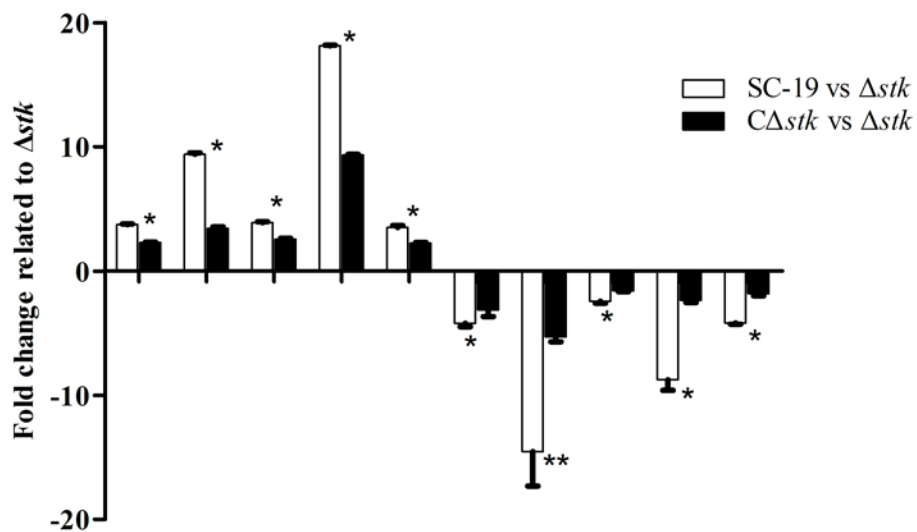

**Figure S2B Comparison of transcription levels of selected genes of SC-19 and  $C\Delta stk$  related to  $\Delta stk$ .** The fold changes in transcription levels of 10 selected genes determined by log<sub>2</sub> transformed. Five depressed genes in  $\Delta stk$  (from left to right: SSU05\_1776, SSU05\_1815, SSU05\_2154, SSU05\_0272, and SSU05\_0309) and five induced genes in  $\Delta stk$  (from left to right: SSU05\_0358, SSU05\_0792, SSU05\_0906, SSU05\_1011, and SSU05\_1532). Statistical significance was determined using the two-tailed *t*-test (\* $p < 0.05$ ; \*\* $p < 0.01$ ).
