# Supplementary material for: The Eukaryote-Like Serine/Threonine Kinase STK Regulates the Growth and Metabolism of Zoonotic Streptococcus suis
Source: Front Cell Infect Microbiol. 2017 Mar 7;7:66. doi: 10.3389/fcimb.2017.00066 (PMC5339665; doi:10.3389/fcimb.2017.00066)
Supplement: Supplementary file 4 [file Table4.XLSX]

## Sheet: Table S4
			Table S4. All peptides detected by phosphoproteome
Sequence	Protein Group Accessions	Description	Modifications	phosphoRS Site Probabilities	phosphoRS Binomial Peptide Score	IonScore	Charge	MH+ [Da]	ΔM [ppm]	WT/Mut1	WT/Mut2	WT/Mut3	average WT/Mut	one sample t-test p value
vTSDLASGAsVL	A0A075SF24	Thiamine biosynthesis protein ApbE OS=Streptococcus suis 6407 GN=ID09_07985 PE=4 SV=1 - [A0A075SF24_STRSU]	N-Term(iTRAQ8plex); S10(Phospho)	T(2): 0.0; S(3): 0.0; S(7): 1.8; S(10): 98.2	223.078	74.44	2	1503.76	-1.5626	1.12603	0.947158	0.947932	1.00704	0.916621
sNPQSGsEGGDLHVIEGIVPPITk	B9WWS2	Oligopeptide/dipeptide ABC transporter, ATPase subunit OS=Streptococcus suis 89/1591 GN=SsuiDRAFT_2596 PE=3 SV=1 - [B9WWS2_STRSU]	N-Term(iTRAQ8plex); S7(Phospho); K24(iTRAQ8plex)	S(1): 0.1; S(5): 3.1; S(7): 96.8; T(23): 0.0	145.998	21.02	4	3119.62	-0.259945	0.767879	0.874735	1.83375	1.15879	0.685495
yDIATEkySEyGNyGk	A0A0F7CLS8	Tyrosine protein kinase OS=Streptococcus suis GN=ZY05719_02760 PE=4 SV=1 - [A0A0F7CLS8_STRSU]	N-Term(iTRAQ8plex); K7(iTRAQ8plex); Y8(Phospho); Y11(Phospho); Y14(Phospho); K16(iTRAQ8plex)	Y(1): 0.0; T(5): 0.0; Y(8): 50.0; S(9): 50.0; Y(11): 99.9; Y(14): 100.0	176.718	31.11	4	3053.36	-4.12884	1.17879	1.2141	0.841873	1.07825	0.577278
vETNGAsGVGNk	A4VUK1	Phosphotransferase system, fructose-specific IIC component OS=Streptococcus suis (strain 05ZYH33) GN=SSU05_0824 PE=4 SV=1 - [A4VUK1_STRSY]	N-Term(iTRAQ8plex); S7(Phospho); K12(iTRAQ8plex)	T(3): 3.0; S(7): 97.0	72.4589	12.23	3	1820.93	-3.80289	0.835996	0.941776	1.06713	0.948301	0.519944
yDIATEkYsEYGNYGk	A0A0F7CLS8	Tyrosine protein kinase OS=Streptococcus suis GN=ZY05719_02760 PE=4 SV=1 - [A0A0F7CLS8_STRSU]	N-Term(iTRAQ8plex); K7(iTRAQ8plex); S9(Phospho); K16(iTRAQ8plex)	Y(1): 0.0; T(5): 0.0; Y(8): 49.3; S(9): 49.3; Y(11): 1.3; Y(14): 0.0	134.553	28.08	3	2893.43	-4.52677	0.94387	3.73862	1.19107	1.95785	0.395797
ySEyGNyGk	A0A0F7CLS8	Tyrosine protein kinase OS=Streptococcus suis GN=ZY05719_02760 PE=4 SV=1 - [A0A0F7CLS8_STRSU]	N-Term(iTRAQ8plex); Y1(Phospho); Y4(Phospho); Y7(Phospho); K9(iTRAQ8plex)	Y(1): 100.0; S(2): 0.1; Y(4): 99.9; Y(7): 100.0	191.444	17.58	2	1928.77	-2.3985	1.21083	1.18441	0.93407	1.10977	0.339279
vNVNtEcQIAFANATR	A0A0F7FJU8	Fructose-bisphosphate aldolase OS=Streptococcus suis GN=ZY05719_01675 PE=4 SV=1 - [A0A0F7FJU8_STRSU]	N-Term(iTRAQ8plex); T5(Phospho); C7(Carbamidomethyl)	T(5): 99.7; T(15): 0.3	53.0911	14.65	3	2192.04	-3.86571	1.03217	0.534077	0.803378	0.789875	0.281773
yAGsNTDTAIVNDLYk	A0A075ST50	Methionine import ATP-binding protein MetN OS=Streptococcus suis 6407 GN=metN PE=3 SV=1 - [A0A075ST50_STRSU]	N-Term(iTRAQ8plex); S4(Phospho); K16(iTRAQ8plex)	Y(1): 1.5; S(4): 48.5; T(6): 48.5; T(8): 1.5; Y(15): 0.0	93.886	22.02	3	2433.21	-3.41425	0.937189	0.833127	0.978667	0.916328	0.192952
tVILHsHNFIPEk	A0A0A7M2I7	Cps31K OS=Streptococcus suis GN=cps31K PE=4 SV=1 - [A0A0A7M2I7_STRSU]	N-Term(iTRAQ8plex); S6(Phospho); K13(iTRAQ8plex)	T(1): 2.6; S(6): 97.4	63.9744	14.65	3	2223.21	-4.0296	1.11119	1.2866	1.77506	1.39095	0.187878
gISVsDLA	A4VYQ9	30S ribosomal protein S5 OS=Streptococcus suis (strain 98HAH33) GN=rpsE PE=3 SV=1 - [RS5_STRS2]	N-Term(iTRAQ8plex); S5(Phospho)	S(3): 50.0; S(5): 50.0	66.4732	30.26	2	1145.58	0.0339502	0.735768	0.629668	0.972881	0.779439	0.161755
ySEYGNyGk	A0A0F7CLS8	Tyrosine protein kinase OS=Streptococcus suis GN=ZY05719_02760 PE=4 SV=1 - [A0A0F7CLS8_STRSU]	N-Term(iTRAQ8plex); Y1(Phospho); Y7(Phospho); K9(iTRAQ8plex)	Y(1): 100.0; S(2): 0.0; Y(4): 0.0; Y(7): 100.0	194.655	25.81	2	1848.8	-3.15039	1.16233	1.35742	1.07623	1.19866	0.139536
yDIAtEkYSEYGNyGk	A0A0F7CLS8	Tyrosine protein kinase OS=Streptococcus suis GN=ZY05719_02760 PE=4 SV=1 - [A0A0F7CLS8_STRSU]	N-Term(iTRAQ8plex); T5(Phospho); K7(iTRAQ8plex); Y14(Phospho); K16(iTRAQ8plex)	Y(1): 0.0; T(5): 99.9; Y(8): 0.1; S(9): 0.0; Y(11): 0.0; Y(14): 100.0	235.393	19.77	4	2973.4	-3.65758	1.56379	1.48783	1.11036	1.38733	0.10986
ySEYGNYGk	A0A0F7CLS8	Tyrosine protein kinase OS=Streptococcus suis GN=ZY05719_02760 PE=4 SV=1 - [A0A0F7CLS8_STRSU]	N-Term(iTRAQ8plex); Y1(Phospho); K9(iTRAQ8plex)	Y(1): 100.0; S(2): 0.0; Y(4): 0.0; Y(7): 0.0	240.313	16.8	2	1768.84	-1.8309	1.05971	1.2758	1.2218	1.18577	0.103536
iSDSLGSPsR	A0A075SF24	Thiamine biosynthesis protein ApbE OS=Streptococcus suis 6407 GN=ID09_07985 PE=4 SV=1 - [A0A075SF24_STRSU]	N-Term(iTRAQ8plex); S9(Phospho)	S(2): 0.0; S(4): 0.0; S(7): 1.7; S(9): 98.3	212.633	23.05	2	1402.69	-2.04895	0.649266	0.565928	0.846202	0.687132	0.0638547
qLTPEEIAELtR	B9WXH0	DivIVA family protein OS=Streptococcus suis 89/1591 GN=SsuiDRAFT_2329 PE=4 SV=1 - [B9WXH0_STRSU]	N-Term(iTRAQ8plex); T11(Phospho)	T(3): 0.0; T(11): 100.0	309.263	42.03	2	1783.91	-2.7461	4.7548	10.1795	6.32819	7.0875	0.0634675
lYEQAAAAQQAAAGQEGAQtANNAGDDVVDGEFTEk	U5UDB7	Chaperone protein DnaK OS=Streptococcus suis T15 GN=dnaK PE=2 SV=1 - [U5UDB7_STRSU]	N-Term(iTRAQ8plex); T20(Phospho); K36(iTRAQ8plex)	Y(2): 0.0; T(20): 100.0; T(34): 0.0	140.737	26.96	4	4327.1	17.3969	1.60798	1.78458	2.2538	1.88212	0.0445582
gLFGsMFE	A0A075SC62	Cell division protein ftsA OS=Streptococcus suis 6407 GN=ID09_02375 PE=3 SV=1 - [A0A075SC62_STRSU]	N-Term(iTRAQ8plex); S5(Phospho)	S(5): 100.0	75.9187	23.82	2	1271.57	-2.7094	4.66005	3.36514	6.14249	4.72256	0.0434518
eVVSSPVPQDtVER	A0A075SSZ7	Aminodeoxychorismate lyase OS=Streptococcus suis 6407 GN=ID09_08910 PE=4 SV=1 - [A0A075SSZ7_STRSU]	N-Term(iTRAQ8plex); T11(Phospho)	S(4): 0.0; S(5): 0.0; T(11): 100.0	451.03	52.77	2	1925.95	-2.04078	7.90808	7.24401	4.68024	6.61078	0.0294139
sVSEAtIDLGk	B9WXK1	RNA-binding protein OS=Streptococcus suis 89/1591 GN=SsuiDRAFT_2085 PE=4 SV=1 - [B9WXK1_STRSU]	N-Term(iTRAQ8plex); T6(Phospho); K11(iTRAQ8plex)	S(1): 0.0; S(3): 0.0; T(6): 100.0	344.401	48.56	2	1807.96	-4.35888	22.9571	15.9193	16.1917	18.356	0.017139
dYAsIDAAPEER	A4VZZ3	Elongation factor Tu OS=Streptococcus suis (strain 98HAH33) GN=tuf PE=3 SV=2 - [EFTU_STRS2]	N-Term(iTRAQ8plex); S4(Phospho)	Y(2): 0.0; S(4): 100.0	193.227	35.47	2	1720.77	-3.3698	0.627162	0.727104	0.726187	0.693484	0.0115037
gFTEEtVR	A4VYN7	UPF0297 protein SSU98_0066 OS=Streptococcus suis (strain 98HAH33) GN=SSU98_0066 PE=3 SV=1 - [Y066_STRS2]	N-Term(iTRAQ8plex); T6(Phospho)	T(3): 0.0; T(6): 100.0	220.204	25.16	2	1322.63	-1.44502	21.6575	30.5645	28.5486	26.9235	0.0106475
tTAIVPEVDk	A0A075SSZ7	Aminodeoxychorismate lyase OS=Streptococcus suis 6407 GN=ID09_08910 PE=4 SV=1 - [A0A075SSZ7_STRSU]	N-Term(iTRAQ8plex); T1(Phospho); K10(iTRAQ8plex)	T(1): 50.0; T(2): 50.0	149.692	26.6	3	1760.96	-3.13248	4.33661	3.68445	4.82622	4.28243	0.00999901
iDVFGsANk	A0A0F7FJU8	Fructose-bisphosphate aldolase OS=Streptococcus suis GN=ZY05719_01675 PE=4 SV=1 - [A0A0F7FJU8_STRSU]	N-Term(iTRAQ8plex); S6(Phospho); K9(iTRAQ8plex)	S(6): 100.0	62.0388	15.27	3	1638.87	-0.497772	0.778806	0.81131	0.839579	0.809898	0.00842292
fENtNFk	B9WVR3	Uncharacterized protein OS=Streptococcus suis 89/1591 GN=SsuiDRAFT_2826 PE=4 SV=1 - [B9WVR3_STRSU]	N-Term(iTRAQ8plex); T4(Phospho); K7(iTRAQ8plex)	T(4): 100.0	135.041	22.64	2	1587.79	-6.26531	11.9455	9.73199	12.1798	11.2858	0.00569891
tTLPTEEsNDVLR	A4VZM2	Cell cycle protein GpsB OS=Streptococcus suis (strain 98HAH33) GN=gpsB PE=3 SV=1 - [GPSB_STRS2]	N-Term(iTRAQ8plex); S8(Phospho)	T(1): 0.0; T(2): 0.0; T(5): 0.0; S(8): 100.0	238.648	41.54	2	1858.9	-2.78523	4.1259	5.0181	4.82718	4.65706	0.00545598
aAAANIVPNStGAAk	A2T9S8	Glyceraldehyde-3-phosphate dehydrogenase (Fragment) OS=Streptococcus suis PE=3 SV=1 - [A2T9S8_STRSU]	N-Term(iTRAQ8plex); T11(Phospho); K15(iTRAQ8plex)	S(10): 50.0; T(11): 50.0	267.74	47.65	3	2044.1	-3.69753	0.553034	0.645405	0.570995	0.589811	0.00471842
eATTILEEtGR	B9WXK1	RNA-binding protein OS=Streptococcus suis 89/1591 GN=SsuiDRAFT_2085 PE=4 SV=1 - [B9WXK1_STRSU]	N-Term(iTRAQ8plex); T9(Phospho)	T(3): 0.0; T(4): 0.0; T(9): 100.0	277.685	42.66	2	1603.78	-2.33876	21.2992	17.6409	21.8556	20.2652	0.00467561
mGFTEEtVR	A4VYN7	UPF0297 protein SSU98_0066 OS=Streptococcus suis (strain 98HAH33) GN=SSU98_0066 PE=3 SV=1 - [Y066_STRS2]	N-Term(iTRAQ8plex); T7(Phospho)	T(4): 0.0; T(7): 100.0	256.378	26.3	2	1453.67	-3.14338	16.8902	18.5829	20.2476	18.5736	0.00302775
gFtEEtVR	A4VYN7	UPF0297 protein SSU98_0066 OS=Streptococcus suis (strain 98HAH33) GN=SSU98_0066 PE=3 SV=1 - [Y066_STRS2]	N-Term(iTRAQ8plex); T3(Phospho); T6(Phospho)	T(3): 100.0; T(6): 100.0	210.629	24.06	2	1402.59	-3.38035	13.7337	15.8664	14.767	14.789	0.00198815
aLDEELPVEEESLDYtR	B9WXH0	DivIVA family protein OS=Streptococcus suis 89/1591 GN=SsuiDRAFT_2329 PE=4 SV=1 - [B9WXH0_STRSU]	N-Term(iTRAQ8plex); T16(Phospho)	S(12): 0.0; Y(15): 0.0; T(16): 100.0	486.273	69.37	2	2392.11	-1.62073	4.69886	5.0152	4.64334	4.7858	0.000934574
vELEGNkVDtk	A0A075SGG6	Serine/threonine protein kinase OS=Streptococcus suis 6407 GN=ID09_02075 PE=4 SV=1 - [A0A075SGG6_STRSU]	N-Term(iTRAQ8plex); K7(iTRAQ8plex); T10(Phospho); K11(iTRAQ8plex)	T(10): 100.0	196.556	9.21	3	2224.22	-5.82094	12.3408	12.9544	13.4362	12.9105	0.000707545
aEIESQkFEtk	B9WTU4	Mid-cell-anchored protein Z OS=Streptococcus suis 89/1591 GN=mapZ PE=3 SV=1 - [B9WTU4_STRSU]	N-Term(iTRAQ8plex); K7(iTRAQ8plex); T10(Phospho); K11(iTRAQ8plex)	S(5): 0.0; T(10): 100.0	155.628	36.8	4	2302.23	-5.04669	17.3067	18.0857	17.664	17.6855	0.000182012
